# Supplementary material
Source: Springer Nature journal article supplement (https://www.springermedizin.de/resource/supplementary/12891_2013_2019_MOESM3_ESM.pdf/9509768)
Supplement: MOESM3 [file 9509768]

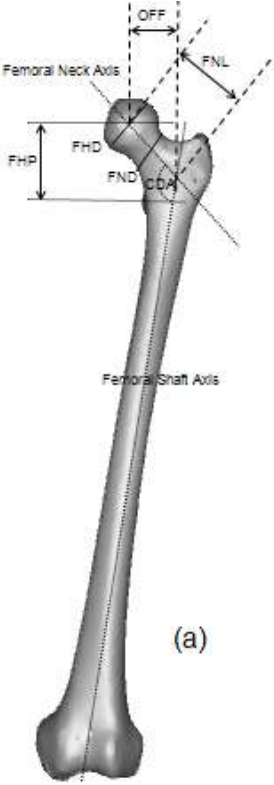

(a)

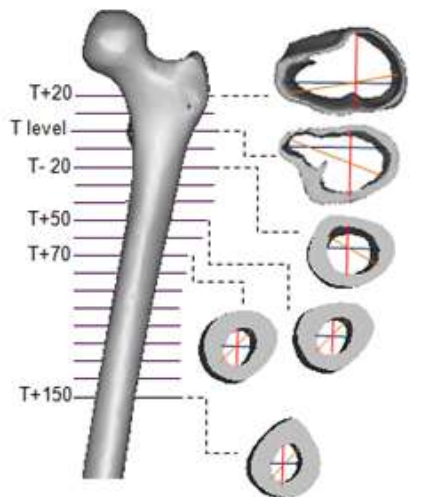

- = the longest mediolateral diameter
- = the longest anteroposterior diameter
- = the longest oblique diameter

(b)

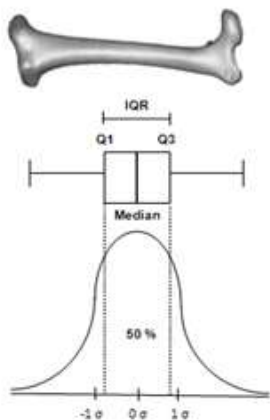

(c)
